# Supplementary material
Source: publisher figshare collection journal article supplement (https://gsapubs.figshare.com/ndownloader/files/23318948)
Supplement: Supplementary file 1 [file 23318948]

## Sheet: LA-ICP-MS
		Durango apatite measurements (LA-ICP-MS)
Bracket	Spot Size (μm)	Li	Na	Mg	Al	Si	P	K	Ca	Sc	Ti	V	Mn	Fe	Co	Ni	Cu	Zn	As	Rb	Sr	Y	Zr	Nb	Mo	Cd	Sn	Sb	Ba	La	Ce	Pr	Nd	Sm	Eu	Gd	Tb	Dy	Ho	Er	Tm	Yb	Lu	Hf	Pb	Bi	Th	U
CA-29	50	3.17103	1914	209.191	<DL	1228.35	159805	<DL	394680	0.122167	<DL	29.4512	94.7294	273.018	0.1543	0.240656	0.0949584	<DL	831.677	0.0406751	513.521	421.868	0.343147	0.00497501	<DL	<DL	1.43291	<DL	1.63744	3389.27	4596.2	358.471	1033.4	128.146	16.4175	109.737	12.6416	69.2592	13.6171	35.5135	4.46836	26.7246	3.60118	0.0196549	0.488688	0.0488634	151.869	8.33459
CV-12	50	3.12421	1861.28	207.404	<DL	1204.11	166258	<DL	394680	0.130364	<DL	28.9373	94.3907	272.169	0.124814	0.173964	0.0966044	<DL	783.882	0.0368681	491.79	408.813	0.342254	0.00571575	<DL	<DL	1.46924	<DL	1.57857	3351.12	4552.47	354.632	1023.84	128.676	16.2892	106.63	12.5349	67.6844	13.3466	36.1986	4.39768	26.5223	3.52634	0.0186432	0.433524	0.0422459	145.304	8.01562
CA-28	50	3.32656	1920.75	211.598	<DL	1202	158936	1.14254	394680	0.0853713	<DL	29.5323	95.1899	295.095	0.0912001	0.180285	<DL	<DL	808.483	0.0478979	512.375	424.134	0.380711	0.00492952	<DL	<DL	1.6538	<DL	1.5657	3498.96	4763.64	363.806	1056.76	131.776	16.541	108.425	12.7654	69.4417	13.8156	36.7585	4.56136	26.8812	3.6529	0.0141769	0.497116	0.0436877	150.342	8.18379
CN-11	50	3.1573	1912.45	209.131	<DL	1181.86	152864	<DL	394680	<DL	<DL	29.1507	94.6872	291.979	0.0897675	<DL	<DL	<DL	794.027	0.0336735	509.918	409.812	0.363714	0.00687361	<DL	<DL	1.62731	<DL	1.61724	3340.97	4587.7	355.242	1021.66	126.488	16.0053	101.728	12.0419	65.819	13.0753	34.7285	4.34016	25.7199	3.44342	0.0133393	0.458005	0.0468844	139.75	7.81859
CN-37	50	3.39081	1925.64	212.162	<DL	1154.16	158629	<DL	394680	0.12748	<DL	29.204	97.7279	295.357	0.0817427	<DL	<DL	<DL	777.15	0.028253	504.883	404.34	0.359843	0.00368492	0.01206	<DL	1.4963	<DL	1.46186	3349.79	4539.14	350.031	1005.88	126.281	16.0282	102.174	12.0938	65.9275	12.9246	34.5328	4.24425	25.6482	3.39985	0.00941977	0.446356	0.0395967	139.092	7.92026
CN-82	50	3.26263	1859.69	210.45	<DL	1197.68	161731	<DL	394680	0.156804	<DL	29.1944	93.55	301.766	0.0772429	<DL	<DL	<DL	751.718	0.0293284	505.162	410.806	0.348975	0.00533333	0.0119573	<DL	1.54205	<DL	1.52196	3377.89	4603.21	353.461	997.802	125.849	15.6361	102.159	12.1126	66.6407	13.1695	34.8397	4.32996	25.9687	3.407	0.012505	0.438312	0.0407109	143.409	7.8076
CN-53	50	2.80825	1868.63	207.422	<DL	1128.21	156502	1.59886	394680	0.0689021	<DL	28.4529	92.9976	334.558	0.0730773	<DL	<DL	<DL	753.05	0.0337093	495.598	406.545	0.336706	0.00365759	<DL	<DL	1.28225	<DL	1.51082	3333.13	4500.03	350.36	983.506	124.715	15.6617	101.376	12.0534	65.7408	13.1215	34.179	4.23836	25.6575	3.31151	0.00974989	0.434386	0.0452748	141.002	7.69849
CA-30	50	3.2822	1823.34	208.808	<DL	1248.63	159272	1.62765	394680	0.171757	<DL	29.4588	93.9183	301.422	0.0946115	<DL	<DL	<DL	752.696	0.0399537	506.907	430.028	0.382642	0.00750067	<DL	0.17911	1.50611	<DL	1.40228	3389.19	4576.25	353.909	1002.95	127.163	15.9458	102.666	12.3542	68.0429	13.3701	35.7181	4.41388	26.5812	3.51901	0.0226295	0.465354	0.0454493	146.308	8.02824
CN-82	50	3.37057	1780.94	208.381	<DL	1182.98	154617	<DL	394680	0.171267	0.457953	29.3156	92.5863	290.28	0.0765673	0.155489	<DL	<DL	712.585	0.0402883	502.934	423.568	0.385725	0.00480603	<DL	0.22091	1.61978	0.193153	1.46191	3347.14	4441.59	348.528	996.63	124.897	15.5982	100.844	12.3088	65.9367	13.1368	35.4183	4.32312	25.7272	3.47413	0.0121768	0.388344	0.0378664	141.23	7.86582
CN40	50	3.09565	1776.74	203.409	<DL	1165.61	155523	<DL	394680	0.117707	<DL	28.8218	91.8989	292.615	0.0865606	<DL	0.0937343	<DL	729.363	0.0425389	499.096	423.533	0.351395	0.00505097	0.0126351	0.176024	1.42182	0.164789	1.48118	3369.76	4591.91	352.122	1007.08	127.062	15.6269	104.713	12.2593	66.9713	13.2688	35.4587	4.46594	26.327	3.46588	0.0129035	0.444049	0.0408129	144.397	7.85264
CA-30	50	3.18321	1830.25	207.723	<DL	1210.06	164608	<DL	394680	0.123451	<DL	29.3935	94.2657	302.751	0.0765183	<DL	<DL	<DL	716.978	0.0507183	502.571	432.376	0.350314	0.00793905	<DL	0.149827	1.50606	0.178949	1.48606	3409.81	4574.29	354.987	1000.97	128.192	15.8901	103.937	12.4549	67.8119	13.6152	36.0182	4.49308	26.5782	3.52654	<DL	0.442695	0.0482338	146.773	7.94082
CN-53	50	3.04156	1795.44	210.367	<DL	1225.6	225422	<DL	394680	0.0982521	<DL	28.8069	93.8351	307.105	0.0658292	<DL	<DL	<DL	694.703	0.0308227	492.309	427.926	0.337967	0.00461787	0.0147558	0.114595	1.83038	0.150631	1.57435	3433.2	4534.61	352.526	1016.43	126.582	15.8883	103.971	12.3768	68.1071	13.3677	36.3393	4.31732	26.2302	3.54517	0.0199047	0.426894	0.0422232	144.513	7.91435
CA-29	35	2.92	1913.71	209.99	<DL	1354.39	154059	<DL	394680	0.199163	<DL	29.8787	96.8964	265.415	0.143798	<DL	0.150993	<DL	806.164	0.0577738	486.905	422.365	0.359686	0.00383646	0.0209758	0.0794767	2.00105	<DL	1.57269	3331.27	4480.32	347.771	1028.59	128.575	15.9568	108.424	12.8184	68.2578	13.7327	35.9992	4.55289	26.5467	3.61522	0.0407949	0.523106	0.0389709	151.09	8.16294
CV-12	35	2.957	1938.94	210.915	<DL	1269.5	159597	<DL	394680	0.170479	<DL	29.6555	95.9503	276.166	0.141218	<DL	<DL	<DL	806.112	0.0326996	490.809	424.408	0.409886	0.00412393	<DL	<DL	1.71869	<DL	1.54729	3393.34	4471.18	351.381	1035.54	133.407	16.5917	109.831	13.0452	70.7034	14.0487	37.3764	4.63343	27.6209	3.69139	0.0185368	0.475937	0.0417167	149.973	7.85306
CA-28	35	2.83409	1882.34	207.966	<DL	1180.76	147372	<DL	394680	<DL	<DL	29.9318	94.2338	293.572	0.117527	<DL	<DL	<DL	849.829	<DL	490.378	438.376	0.390707	0.00750196	0.0335735	<DL	2.13947	<DL	1.60391	3553.95	4658.26	363.94	1071.24	136.399	16.6738	111.403	13.5314	72.0109	14.6575	38.1915	4.80843	28.0752	3.84334	0.0264761	0.505501	0.0456464	154.681	8.31575
CN-11	35	3.45834	1833.01	200.162	<DL	1231.44	142334	<DL	394680	<DL	<DL	30.3032	95.8607	295.44	0.0857835	<DL	<DL	<DL	793.038	0.0442659	481.613	426.889	0.340602	0.01546	0.0304814	<DL	2.13418	<DL	1.59222	3392.4	4424.09	348.376	1035.51	130.956	15.8942	108.73	12.8464	69.649	13.8018	36.2923	4.47833	27.1583	3.56081	0.0130821	0.417729	0.0441618	147.749	7.93219
CN-37	35	3.77224	1856.9	204.481	<DL	1314.7	151244	<DL	394680	<DL	<DL	30.0503	96.6449	293.782	<DL	<DL	<DL	<DL	825.999	<DL	486.519	420.913	0.401418	0.0100824	<DL	<DL	1.7442	<DL	1.48564	3462.94	4477.52	352.956	1048.08	131.727	16.2762	105.881	12.5463	68.5764	13.6012	35.9625	4.5733	26.9123	3.60839	0.0149064	0.457472	<DL	145.737	7.89733
CN-82	35	3.52138	1881.73	206.32	<DL	1245.3	154614	<DL	394680	<DL	<DL	30.2543	95.8337	299.262	0.0575067	<DL	<DL	<DL	795.053	0.0389325	484.904	427.636	0.338227	0.00739692	<DL	<DL	2.44792	<DL	1.4821	3441.08	4493.79	347.983	1040.32	132.87	16.1514	107.573	12.7992	70.752	14.0663	37.4659	4.68571	27.2811	3.64183	<DL	0.446635	0.0409461	147.947	7.86539
CN-53	35	3.32207	1884.2	207.32	<DL	1311.6	152332	<DL	394680	<DL	<DL	29.5316	93.3658	322.968	<DL	<DL	<DL	<DL	786.762	<DL	474.374	414.779	0.366324	0.00882218	0.0243793	<DL	1.61616	<DL	1.5369	3398.83	4431.03	343.684	1016.56	128.004	15.8023	106.129	12.5816	68.6863	13.6079	36.2688	4.54178	26.9888	3.69747	<DL	0.467441	0.041249	148.116	7.73106
CA-30	35	3.1655	1830.28	203.947	<DL	1306.67	154679	<DL	394680	<DL	<DL	29.9417	92.326	277.066	0.0732604	<DL	<DL	<DL	754.823	0.0539848	482.548	436.572	0.359092	<DL	<DL	0.261166	1.25218	<DL	1.51932	3461.71	4476.44	342.76	1038.83	132.421	16.1484	109.905	13.052	72.3695	14.0816	37.8947	4.59235	27.6135	3.7728	0.0302904	0.404134	<DL	152.677	8.07496
CN-82	35	3.41607	1792.72	206.122	<DL	1209.13	146473	<DL	394680	<DL	<DL	30.1878	92.4435	282.896	<DL	<DL	<DL	<DL	735.275	0.0695316	480.778	432.261	0.42114	0.01069	<DL	<DL	1.44317	<DL	1.42648	3397.77	4391.27	337.274	1030.65	131.825	16.1272	107.446	12.8833	68.7473	14.1091	37.5962	4.43732	26.7916	3.63821	<DL	0.476535	0.0704581	147.854	7.83069
CN40	35	2.9553	1812.42	208.41	<DL	1415.89	154988	<DL	394680	<DL	0.36253	29.6536	95.9626	301.211	<DL	<DL	<DL	<DL	768.721	<DL	486.967	444.198	0.332186	0.0070918	<DL	<DL	1.69607	<DL	1.64122	3580.06	4650.35	347.128	1063.31	133.699	16.4122	111.483	13.3445	73.2106	14.3684	38.1256	4.72075	28.1555	3.68722	<DL	0.446016	<DL	155.54	7.99178
CA-30	35	2.55887	1823	204.569	<DL	1201.54	161903	<DL	394680	<DL	<DL	29.7509	93.1825	306.125	<DL	<DL	<DL	<DL	750.999	0.0687145	480.645	440.789	0.373579	<DL	<DL	<DL	1.83979	<DL	1.30951	3505.2	4453.69	338.702	1038.7	131.213	16.0739	109.932	13.0909	70.1416	13.9893	37.718	4.68889	27.9089	3.71295	<DL	0.465106	<DL	150.611	7.73548
CN-53	35	3.26194	1801.22	204.932	<DL	1151.74	218001	<DL	394680	0.216433	0.310266	28.8702	91.3535	304.922	<DL	<DL	<DL	<DL	707.547	<DL	466.378	429.298	0.370793	0.00545471	<DL	<DL	1.49647	<DL	1.33024	3417.78	4400.6	335.536	1025.57	129.36	15.8839	107.027	12.8342	69.2376	14.0188	36.1261	4.58127	27.8277	3.66628	<DL	0.430955	0.0591329	148.051	7.83651
CA-29	25	2.84357	1820.61	202.159	0	1342.23	146599	<DL	394680	0.194875	<DL	30.1912	90.6852	260.313	0.110478	<DL	<DL	<DL	802.085	0.0447273	476.11	438.739	0.36716	0.0137439	<DL	<DL	2.00228	<DL	1.56511	3380.36	4290.37	338.828	1042.28	132.728	16.514	114.245	13.4743	72.2534	14.6624	38.371	4.86543	27.97	3.78465	<DL	0.450756	<DL	154.44	8.074
CV-12	25	3.06855	1800.06	202.46	<DL	1458.75	154003	<DL	394680	<DL	<DL	30.6535	92.5043	276.039	0.104346	<DL	0.309484	<DL	798.343	0.0907431	488.301	439.552	0.373124	<DL	<DL	<DL	1.92737	<DL	1.14046	3474.48	4396.07	341.076	1055.16	134.198	16.4754	113.584	13.4755	71.7546	14.5841	38.9559	4.70233	28.3899	3.72719	0.0298218	0.403276	0.0541978	152.579	7.74408
CA-28	25	3.79489	1855.9	202.97	<DL	1349.09	146451	<DL	394680	<DL	<DL	30.2365	90.8255	288.495	<DL	<DL	<DL	1.01638	821.5	0.0650208	489.066	454.362	0.397481	0.00942906	<DL	<DL	3.32775	<DL	1.55013	3624.36	4499	352.654	1074.51	137.236	16.9175	113.764	13.8702	73.7442	14.6575	38.9326	4.88893	28.1075	3.78975	<DL	0.43607	<DL	155.066	7.97474
CN-11	25	2.82986	1799.79	199.889	<DL	1272.94	141633	<DL	394680	<DL	<DL	30.7112	90.0085	285.222	<DL	<DL	<DL	<DL	768.539	<DL	478.325	435.294	0.350883	<DL	<DL	<DL	2.05875	<DL	1.53677	3423.18	4300.38	335.896	1049.63	132.091	15.7696	108.36	12.6984	69.1621	13.6613	37.2808	4.44161	28.1	3.65866	0.0199872	0.425381	0.0487097	148.512	7.83134
CN-37	25	2.77296	1807.12	196.459	<DL	1281.69	145639	<DL	394680	0.255072	<DL	29.3088	91.379	290.065	<DL	<DL	<DL	<DL	766.169	<DL	471.4	419.959	0.405167	0.0137615	<DL	<DL	2.04297	<DL	1.29922	3408.52	4378.57	335.963	1028.11	130.586	15.7985	105.768	12.7365	69.1014	13.5843	35.9014	4.44469	26.3566	3.59706	<DL	0.380566	<DL	143.009	7.64143
CN-82	25	3.5489	1872.25	198.37	<DL	1306.5	154436	<DL	394680	<DL	0.975341	29.7816	89.8804	289.557	0.113164	<DL	<DL	<DL	778.664	<DL	475.434	427.271	0.343407	<DL	<DL	<DL	2.4928	<DL	1.47382	3432.94	4379.1	332.519	1037.16	131.871	16.4646	107.626	12.8965	69.6062	13.8643	37.5471	4.60134	27.803	3.58057	<DL	0.477389	<DL	145.628	7.72445
CN-53	25	3.98914	1944.65	204.527	<DL	1497.16	154426	<DL	394680	<DL	<DL	30.4117	92.6889	337.144	0.10558	<DL	<DL	<DL	800.331	<DL	487.654	442.228	0.38164	0.00606388	<DL	<DL	1.92322	<DL	1.52961	3507.67	4416.85	342.573	1048.35	133.581	16.5999	111.67	13.3846	73.3066	14.0907	37.876	4.79257	27.8089	3.74632	<DL	0.426612	<DL	152.926	7.6699
CA-30	25	3.13251	1889.01	204.45	<DL	961.262	152129	<DL	394680	<DL	<DL	29.9581	93.9962	277.526	<DL	<DL	<DL	<DL	789.46	<DL	479.292	438.608	0.421641	0.0110408	<DL	0.348657	<DL	<DL	1.54678	3477.46	4418.11	342.7	1034.71	132.64	16.3889	110.785	13.2077	71.8672	14.3822	37.9039	4.61216	28.174	3.89878	<DL	0.322791	<DL	155.426	8.09834
CN-82	25	3.01203	1823.28	202.904	<DL	1370.03	148407	<DL	394680	<DL	<DL	29.5818	90.0205	274.02	<DL	<DL	<DL	<DL	749.614	0.0873966	480.591	429.833	0.410431	0.00996596	<DL	<DL	<DL	<DL	1.03003	3373.87	4360.74	336.194	1034.12	130.009	15.4437	104.38	12.8804	67.8497	13.8651	35.8758	4.61966	26.7277	3.79897	0.0301838	0.434443	<DL	144.174	7.40907
CN40	25	3.7931	1817.57	211.973	<DL	1284.53	155526	<DL	394680	<DL	<DL	29.2211	93.4531	296.044	<DL	<DL	<DL	<DL	782.824	<DL	476.303	434.727	0.325642	0.00974818	<DL	<DL	<DL	<DL	1.27182	3491.62	4430.26	342.215	1054.78	135.041	15.9146	109.882	12.9181	71.5289	13.7731	37.8867	4.66343	28.8318	3.68644	0.0246221	0.520078	<DL	151.63	8.12961
CA-30	25	2.44786	1843.02	205.728	<DL	1264.76	160864	<DL	394680	<DL	<DL	29.9012	92.016	297.266	<DL	<DL	<DL	<DL	781.549	0.0907115	478.907	437.999	0.337183	<DL	<DL	<DL	<DL	<DL	1.48565	3524.53	4430.27	334.892	1030.11	131.785	15.7464	108.92	13.1716	70.6394	14.0683	37.29	4.67535	27.5249	3.72659	<DL	0.433769	<DL	148.485	7.7701
CN-53	25	2.87246	1865.2	210.974	<DL	1244.66	223850	<DL	394680	<DL	<DL	29.5815	93.5524	296.08	<DL	<DL	<DL	<DL	750.457	<DL	475.439	444.55	0.365409	0.0157176	<DL	<DL	<DL	<DL	1.61201	3553.86	4534.59	343.946	1056.57	133.748	15.844	106.839	13.0595	73.2646	14.3623	37.2449	4.50693	27.4963	3.73947	0.0278871	0.362214	<DL	150.585	8.02734

## Sheet: EPMA
Durango apatite measurements (EPMA)
Standard	P	Na	Ca	Cl	Mn	Fe	S	Sr	Si	Mg	F	Ce	O	Total
STD_0067	18.85	0.17	37.27	0.36	0.01	0.03	0.12	0.03	0.17	0.01	3.31	0.9	39.83	101.06
STD_0067	18.8	0.14	37.33	0.35	0.02	0.02	0.11	0.01	0.17	0.01	3.37	0.85	39.75	100.94
STD_0067	18.71	0.16	37.13	0.33	0.03	0.03	0.11	0.05	0.17	0.01	3.32	0.85	39.58	100.47
STD_0067	18.53	0.18	37.11	0.31	0	0.02	0.11	0.03	0.17	0	3.36	0.85	39.32	100
STD_0067	18.62	0.17	37.02	0.32	0.02	0.04	0.1	0.03	0.17	0.01	3.26	0.86	39.4	100.02
STD_0067	18.37	0.16	37.16	0.35	0.01	0.01	0.11	0.03	0.17	0.01	3.38	0.85	39.14	99.76
STD_0067	18.6	0.19	37.15	0.34	-0.01	0.03	0.11	0.02	0.17	0.01	3.37	0.89	39.45	100.32
STD_0067	18.44	0.18	37.15	0.38	0.02	0.04	0.1	0.04	0.17	0.01	3.33	0.82	39.21	99.9
STD_0067	18.55	0.18	37.25	0.33	0.03	0.02	0.12	0.04	0.17	0	3.28	0.81	39.42	100.19
STD_0067	18.57	0.15	37.09	0.34	0	0.02	0.09	0.05	0.17	0.01	3.34	0.83	39.34	100
